# Supplementary material for: Development of Improved DNA Collection and Extraction Methods for Handled Documents
Source: MDPI journal article supplement (doi:10.3390/genes14030761), 2023-03-21
Supplement: s1 [file s1]

## Supplemental Figures

```
Call:
lm(formula = Quant ~ Emethod + Sampling)

Residuals:
    Min       1Q   Median       3Q      Max
-0.0015500 -0.0005458 -0.0003333  0.0004333  0.0017833

Coefficients:
              Estimate Std. Error t value Pr(>|t|)
(Intercept)   0.0004333   0.0004853    0.893   0.3870
EmethodQIAamp -0.0008667   0.0004853   -1.786   0.0958 .
Samplingdry    0.0012167   0.0005944    2.047   0.0599 .
Samplingwet_dry 0.0010833   0.0005944    1.823   0.0898 .
---
Signif. codes:  0 '***' 0.001 '**' 0.01 '*' 0.05 '.' 0.1 ' ' 1

Residual standard error: 0.001029 on 14 degrees of freedom
Multiple R-squared:  0.3703,    Adjusted R-squared:  0.2353
F-statistic: 2.744 on 3 and 14 DF,  p-value: 0.08246
```

**Figure S1.** Summary of multiple regression for extraction method and sampling method predictors for quantitation value

For EmethodQIAamp: ChelexTween=0, QIAamp=1

For Samplingdry: cutting=0, dry=1, wet\_dry=0

For Samplingwet\_dry: cutting=0, dry=0, wet\_dry=1

```
Call:
lm(formula = AboveLAT ~ Quant + Sampling + Emethod)

Residuals:
    Min       1Q   Median       3Q      Max
-2.7012 -0.5216  0.0901  0.3894  4.9794

Coefficients:
              Estimate Std. Error t value Pr(>|t|)
(Intercept)   0.35655    0.91521    0.390 0.703155
Quant        2638.73287   490.26756    5.382 0.000125 ***
Samplingdry   -0.04379    1.24279   -0.035 0.972426
Samplingwet_dry -1.19196    1.21277   -0.983 0.343625
EmethodQIAamp -0.71310    0.98642   -0.723 0.482536
---
Signif. codes:  0 '***' 0.001 '**' 0.01 '*' 0.05 '.' 0.1 ' ' 1

Residual standard error: 1.888 on 13 degrees of freedom
Multiple R-squared:  0.7895,    Adjusted R-squared:  0.7248
F-statistic: 12.19 on 4 and 13 DF,  p-value: 0.0002445
```

**Figure S2.** Summary of multiple regression for extraction method, sampling method, and quantitation value predictors for total number of peaks observed above the lower analytical threshold.

For EmethodQIAamp: ChelexTween=0, QIAamp=1

For Samplingdry: cutting=0, dry=1, wet\_dry=0

For Samplingwet\_dry: cutting=0, dry=0, wet\_dry=1

```
Call:
lm(formula = Quant ~ as.factor(Glass_plastic) + as.factor(W_D))

Residuals:
    Min       1Q   Median       3Q      Max
-0.0024667 -0.0004417 -0.0002000  0.0005667  0.0036333

Coefficients:
              Estimate Std. Error t value Pr(>|t|)
(Intercept)    5.000e-04  8.918e-04   0.561   0.5887
as.factor(Glass_plastic)1 2.067e-03  1.030e-03   2.007   0.0757
as.factor(W_D)1        3.333e-05  1.030e-03   0.032   0.9749
---
Signif. codes:  0 '***' 0.001 '**' 0.01 '*' 0.05 '.' 0.1 ' ' 1

Residual standard error: 0.001784 on 9 degrees of freedom
Multiple R-squared:  0.3092,    Adjusted R-squared:  0.1557
F-statistic: 2.014 on 2 and 9 DF,  p-value: 0.1893
```

**Figure S3** Summary of multiple linear regression for pipette material and wet and dry swabbing as predictors for quantitation value for dry vacuum method

For Glass\_plastic: glass=0, plastic=1

For W\_D: dry=0, wet=1

```
> vac_aov2<-aov(Quant~Collection.method)
> summary(vac_aov2)

              Df    Sum Sq   Mean Sq F value Pr(>F)
Collection.method  3 1.347e-05  4.490e-06   1.284  0.344
Residuals         8 2.798e-05  3.498e-06
```

**Figure S4** One-way ANOVA summary for vacuum collection method comparison

```
Grubbs test for one outlier

data: Quant
G = 5.82522, U = 0.00278, p-value <2e-16
alternative hypothesis: highest value 3.2568 is an outlier
```

**Figure S5** Grubbs Test summary for stability study

|                  | Df | Sum Sq  | Mean Sq | F value | Pr(>F) |
|------------------|----|---------|---------|---------|--------|
| as.factor(month) | 11 | 0.00396 | 0.00036 | 0.34    | 0.97   |
| Residuals        | 23 | 0.02449 | 0.00106 |         |        |

**Figure S6** One-way ANOVA summary for stability study

```
Call:
lm(formula = alleles.detected ~ Quant + as.factor(month))

Residuals:
    Min       1Q   Median       3Q      Max
-19.115  -7.907   0.077   6.514  16.571

Coefficients:
              Estimate Std. Error t value Pr(>|t|)
(Intercept)      8.5886     6.8411   1.26    0.22
Quant           408.9198    73.5267   5.56 1.4e-05 ***
as.factor(month)1    2.1140     9.4666   0.22    0.83
as.factor(month)2   -0.0496    10.6053   0.00    1.00
as.factor(month)3    10.5266     9.4417   1.11    0.28
as.factor(month)4     2.3556     9.4331   0.25    0.81
as.factor(month)5    -0.5093     9.4127  -0.05    0.96
as.factor(month)6   -11.8488     9.4681  -1.25    0.22
as.factor(month)7    -3.8215     9.4091  -0.41    0.69
as.factor(month)8     7.9442     9.4103   0.84    0.41
as.factor(month)9     6.8178     9.4299   0.72    0.48
as.factor(month)10    4.9839     9.4046   0.53    0.60
as.factor(month)11   10.0198     9.4798   1.06    0.30
---
Signif. codes:  0 '***' 0.001 '**' 0.01 '*' 0.05 '.' 0.1 ' ' 1

Residual standard error: 11.5 on 22 degrees of freedom
Multiple R-squared:  0.614,    Adjusted R-squared:  0.404
F-statistic: 2.92 on 12 and 22 DF,  p-value: 0.0142
```

**Figure S7** Multiple regression summary for stability study
